# Supplementary material for: High TRB3 expression induces chondrocyte autophagy and senescence in osteoarthritis cartilage
Source: PubMed Central journal article supplement (PMC9320551; doi:10.18632/aging.204066), 2022-07-01
Supplement: aging-14-204066-s001.pdf [file aging-14-204066-s001.pdf]

**SUPPLEMENTARY FIGURE**

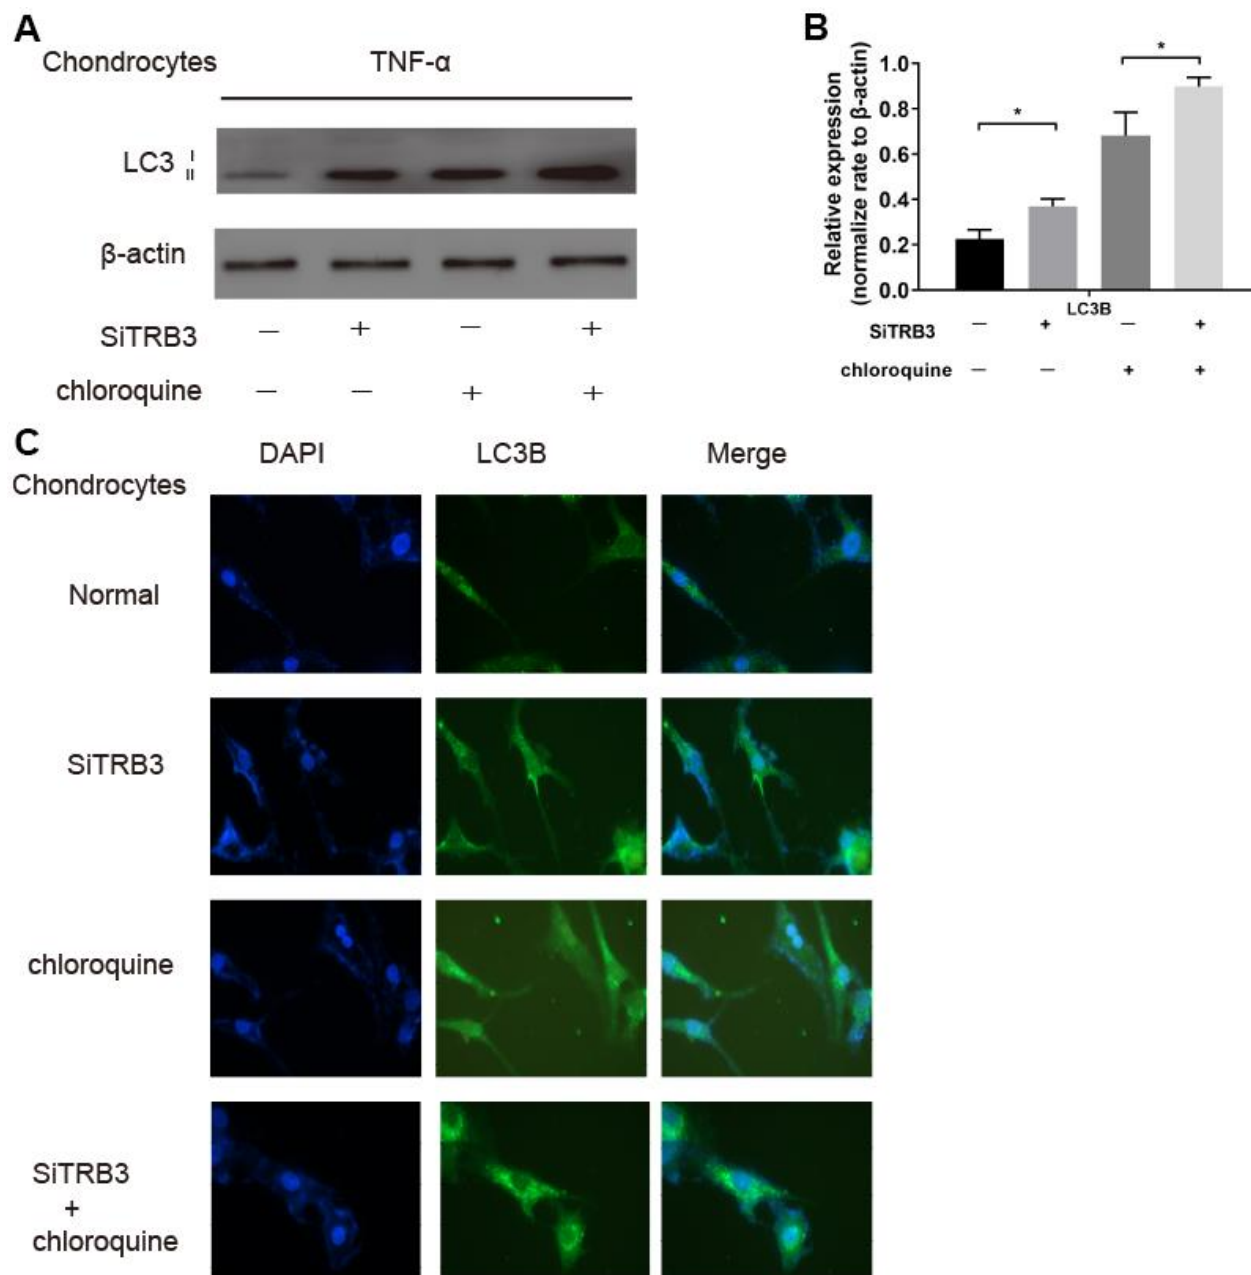

**Supplementary Figure 1. Chloroquine block TRB3-siRNA induced autophagy in chondrocytes.** (A, B) protein expression of LC3B in isolated chondrocytes from young healthy treated with TNF- $\alpha$ , SiTRB3 or chloroquine. (C) Chondrocyte autophagic activity was detected by Immunofluorescence of LC3B staining. The results are described as the mean  $\pm$  SD. \*P < 0.05, \*\*P < 0.01 vs. normal group.
